# Supplementary material
Source: Springer Nature journal article supplement (https://www.springermedizin.de/resource/supplementary/12888_2008_538_MOESM3_ESM.pdf/9483550)

**A**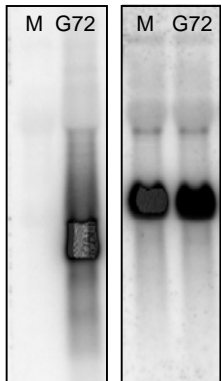**G72 probe** **Actin probe****B**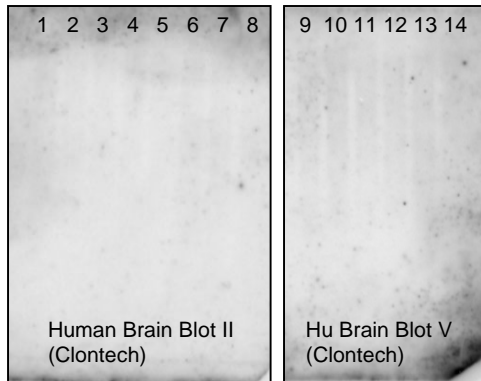**G72 probe****G72 probe****C**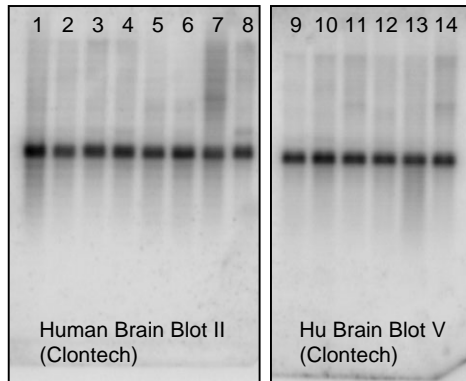**Actin probe****Actin probe**

Supplement: MOESM3 [file 9483550]
